# Supplementary material for: A Current Review of Water Pollutants in American Continent: Trends and Perspectives in Detection, Health Risks, and Treatment Technologies
Source: MDPI journal article supplement (doi:10.3390/ijerph20054499), 2023-03-03
Supplement: s1 [file s1]

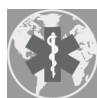

Review

# A current review of water pollutants in American continent: Trends and perspectives in detection, health risks, and treatment technologies

Walter M. Warren-Vega, Armando Campos-Rodríguez, Ana I. Zárate-Guzmán\*, Luis A. Romero-Cano\*

Grupo de Investigación en Materiales y Fenómenos de Superficie. Facultad de Ciencias Químicas. Universidad Autónoma de Guadalajara. Av. Patria 1201, C.P. 45129. Zapopan, Jalisco. MEXICO.

\* Correspondence: aizg\_08@hotmail.com (A.I.Z.-G.); luis.cano@edu.uag.mx (L.A.R.-C.)

**Supplementary Table S1.** Comparative table of analytical techniques most used for the detection of inorganic contaminants present in water.

|                      | ICP (OES & MS)                             | AA                                         | Electrochemistry     |
|----------------------|--------------------------------------------|--------------------------------------------|----------------------|
| Detection limits     | Excellent                                  | Very Good                                  | Very Good            |
| Sample throughput    | 75 elements/6 min                          | 1 element/15 s                             | 1 element/30 s       |
| Precision            | 1.0 – 3.0 %                                | 0.1 – 1.0 %                                | 0.1 – 1.0 %          |
| No. of elements      | 75                                         | 68                                         | Depends on electrode |
| Sample usage         | Low                                        | Very low                                   | Low                  |
| Routine operation    | easy                                       | easy                                       | Easy                 |
| Method development   | Skill required                             | easy                                       | Skill required       |
| Unattended operation | Yes                                        | No                                         | No                   |
| Analysis             | sample transport to specialized laboratory | sample transport to specialized laboratory | In situ              |
| Operating cost       | High                                       | Low                                        | Low                  |
| Capital cost         | Very high                                  | Low                                        | Medium               |

Reference: Tyler, Geoff, and J. Yvon. "ICP-OES, ICP-MS and AAS Techniques Compared." *ICP Optical Emission Spectroscopy Technical Note 5* (1995).

**Supplementary Table S2.** Comparison of detection limits in mg L<sup>-1</sup> at 3 sigma

| Element | ICP-MS  | ICP-OES | Flame AAS | GF-AAS |
|---------|---------|---------|-----------|--------|
| As      | < 0.050 | < 5     | < 500     | < 1    |
| Al      | < 0.010 | < 0.05  | < 50      | < 0.5  |
| Ba      | < 0.005 | < 0.05  | < 50      | < 1.5  |
| Be      | < 0.050 | < 0.05  | < 5       | < 0.05 |
| Bi      | < 0.005 | < 5     | < 100     | < 1    |
| Br *    | ND      | < 100   | ND        | ND     |
| Cd      | < 0.010 | < 0.05  | < 5       | < 0.03 |
| Cl *    | ND      | < 200   | ND        | ND     |
| Ce      | < 0.005 | < 5     | < 200000  | ND     |
| Co      | < 0.005 | < 1     | < 10      | < 0.5  |
| Cr      | < 0.005 | < 1     | < 10      | < 0.15 |
| Cu      | < 0.010 | < 1     | < 5       | < 0.5  |
| Gd      | < 0.005 | < 5     | < 4000    | ND     |
| Ho      | < 0.005 | < 1     | < 80      | ND     |
| I       | ND      | < 10    | ND        | ND     |
| In      | < 0.010 | < 20    | < 80      | < 0.5  |
| La      | < 0.005 | < 0.05  | < 4000    | ND     |
| Li      | < 0.020 | < 1     | < 5       | < 0.5  |
| Mn      | < 0.005 | < 0.1   | < 5       | < 0.06 |
| Ni      | < 0.005 | < 1     | < 20      | < 0.5  |
| Pb      | < 0.005 | < 5     | < 20      | < 0.5  |
| Se      | < 0.10  | < 5     | < 1000    | < 1.0  |
| Ti      | < 0.010 | < 5     | < 40      | < 1.5  |
| U       | < 0.010 | < 20    | < 100000  | ND     |
| Y       | < 0.005 | < 0.5   | < 500     | ND     |
| Zn      | < 0.02  | < 0.5   | < 2       | < 0.01 |

\* Only possible with far UV capable spectrometers (< 155nm)

ICP-MS, ICP-OES, Flame AAS: Detection limits defined with 3 standard deviations

GF-AAS: Sensitivity (0.0044 absorbance) measured with 20 mL

ND = not determined

Reference: Tyler, Geoff, and J. Yvon. "ICP-OES, ICP-MS and AAS Techniques Compared." *ICP Optical Emission Spectroscopy Technical Note 5* (1995).
